# Supplementary material for: Placental growth factor testing for suspected pre‐eclampsia: a cost‐effectiveness analysis
Source: PubMed Central journal article supplement (PMC6771855; doi:10.1111/1471-0528.15855), 2019-07-17
Supplement: BJO-126-1390-s001.pdf [file BJO-126-1390-s001.pdf]

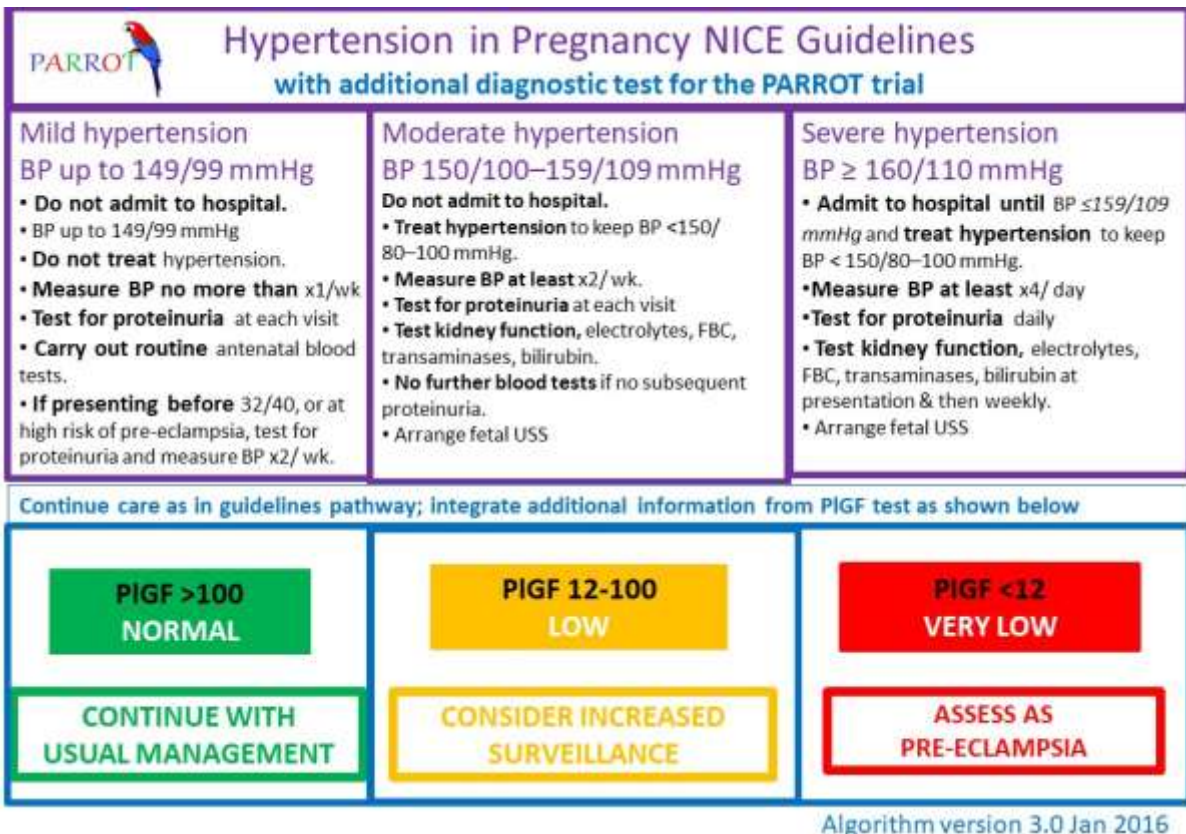

Algorithm version 3.0 Jan 2016

Figure S1. PARROT Trial Clinical Management Algorithm
