# Supplementary material for: Placental growth factor testing for suspected pre‐eclampsia: a cost‐effectiveness analysis
Source: PubMed Central journal article supplement (PMC6771855; doi:10.1111/1471-0528.15855), 2019-07-17
Supplement: BJO-126-1390-s002.pdf [file BJO-126-1390-s002.pdf]

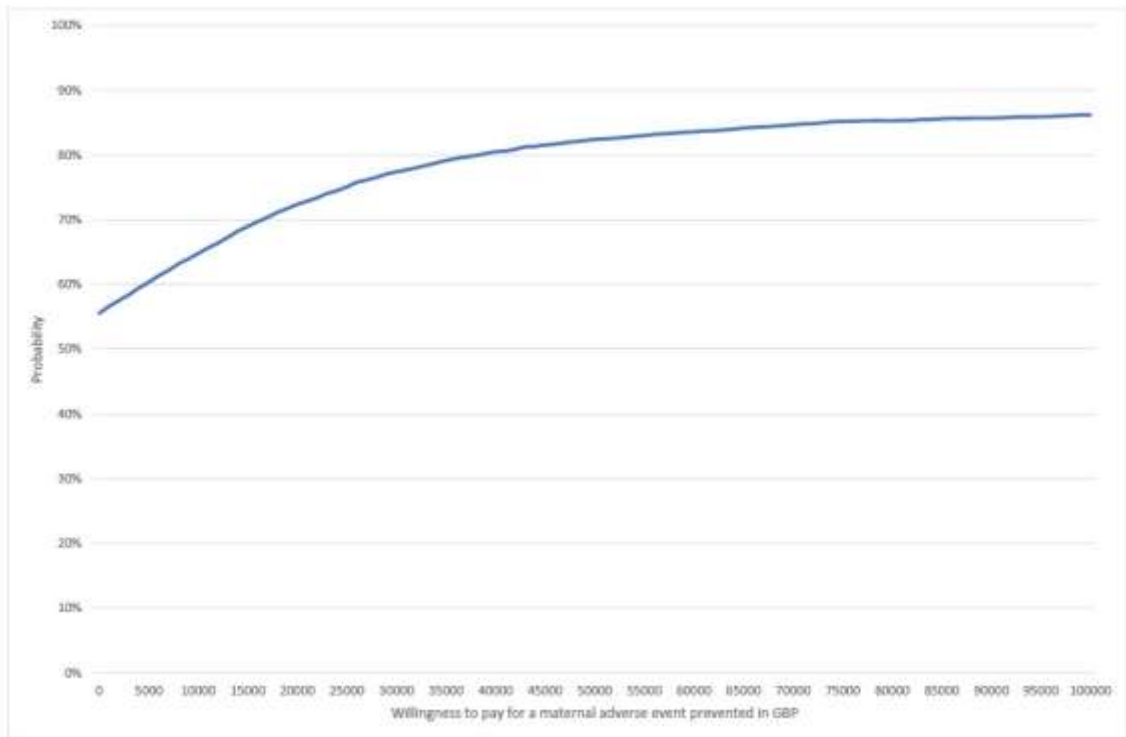

**Figure S2.** Probability that PIGF testing in women presenting with preeclampsia compared to current practice is cost-effective for a range of values of willingness to pay for a maternal adverse event prevented.
