# Supplementary material for: Placental growth factor testing for suspected pre‐eclampsia: a cost‐effectiveness analysis
Source: PubMed Central journal article supplement (PMC6771855; doi:10.1111/1471-0528.15855), 2019-07-17
Supplement: BJO-126-1390-s003.pdf [file BJO-126-1390-s003.pdf]

**Table S1.** Unit costs (per day for inpatient stays) for resource use taken from 2016/2017 National Schedule of Reference Costs (2016/2017 GBP)<sup>26</sup>

| <b>Resource</b>                              | <b>Unit cost (£)</b> |
|----------------------------------------------|----------------------|
| Outpatient                                   | 129                  |
| Antenatal ward                               | 809                  |
| Labour Ward                                  | 724                  |
| Maternal Intensive Care/High Dependency Care | 1012                 |
| Neonatal Unit                                | 340                  |

**Table S2.** Model inputs for revealed PIGF testing for antenatal costs

|             | <b>Diagnosis</b> | <b>Outpatient visits, n mean</b> | <b>Outpatient visits, n SE</b> | <b>Cost</b> | <b>Antenatal Ward</b> | <b>Antenatal ward se</b> | <b>Cost</b> | <b>Labour ward</b> | <b>Labour ward SE</b> | <b>Cost</b> |
|-------------|------------------|----------------------------------|--------------------------------|-------------|-----------------------|--------------------------|-------------|--------------------|-----------------------|-------------|
| PIGF>100    | Normal           | 6.039471                         | 0.821633                       | 778.0047    | 1.087079              | 0.213071                 | 879.4469    | 0.538285           | 0.115798              | 389.7185    |
|             | GH/CHT/SGA       | 7.986798                         | 0.945846                       | 1028.859    | 1.542404              | 0.235514                 | 1247.805    | 0.692995           | 0.123705              | 501.7284    |
|             | Pre-eclampsia    | 8.376477                         | 1.485062                       | 1079.058    | 5.153079              | 1.179306                 | 4168.841    | 0.794508           | 0.196133              | 575.2239    |
| Plgf<100>12 | Normal           | 5.36796                          | 1.098899                       | 691.5006    | 0.81746               | 0.274417                 | 661.3251    | 0.704587           | 0.2004                | 510.1206    |
|             | GH/CHT/SGA       | 7.483879                         | 0.990128                       | 964.0733    | 2.372329              | 0.412841                 | 1919.214    | 0.671975           | 0.132991              | 486.5096    |
|             | Pre-eclampsia    | 5.180283                         | 0.622814                       | 667.3241    | 5.709159              | 0.813716                 | 4618.71     | 0.782674           | 0.140804              | 566.6557    |
| PIGF<12     | Normal           |                                  |                                |             |                       |                          |             |                    |                       |             |
|             | GH/CHT/SGA       | 5.698915                         | 1.349894                       | 734.1342    | 5.921327              | 1.875136                 | 4790.354    | 0.422098           | 0.165004              | 305.5992    |
|             | Pre-eclampsia    | 4.425083                         | 0.539258                       | 570.0392    | 6.322338              | 0.906354                 | 5114.771    | 0.577905           | 0.108955              | 418.4029    |

**Table S3.** Model inputs for revealed PIGF testing for postnatal costs

|             | <b>Diagnosis</b> | <b>Postnatal ward Mean</b> | <b>Postnatal ward SE</b> | <b>Cost</b> | <b>High need</b> | <b>High need SE</b> | <b>Cost</b> |
|-------------|------------------|----------------------------|--------------------------|-------------|------------------|---------------------|-------------|
| PIGF>100    | Normal           | 1.528936                   | 0.176884                 | 1106.95     | 0.097257         | 0.041836            | 98.42439    |
|             | GH/CHT/SGA       | 1.840509                   | 0.16592                  | 1332.529    | 0.175934         | 0.051856            | 178.0448    |
|             | Pre-eclampsia    | 3.165373                   | 0.436271                 | 2291.73     | 0.528301         | 0.204471            | 534.6404    |
| Plgf<100>12 | Normal           | 1.932686                   | 0.341121                 | 1399.265    | 0.152544         | 0.09401             | 154.3747    |
|             | GH/CHT/SGA       | 2.826986                   | 0.275142                 | 2046.738    | 0.134063         | 0.051758            | 135.672     |
|             | Pre-eclampsia    | 3.387897                   | 0.273765                 | 2452.837    | 0.521421         | 0.131584            | 527.6775    |
| PIGF<12     | Normal           |                            |                          |             |                  |                     |             |
|             | GH/CHT/SGA       | 3.221175                   | 0.585443                 | 2332.131    | 0.208702         | 0.136497            | 211.2065    |
|             | Pre-eclampsia    | 4.201791                   | 0.321327                 | 3042.097    | 1.214391         | 0.289255            | 1228.964    |

**Table S4.** Model inputs for revealed PIGF testing for infant costs

|             | <b>Diagnosis</b>  | <b>Infant<br/>admitted<br/>HDU/ICU</b> | <b>Infant<br/>admit SE</b> | <b>Infant<br/>los<br/>HDU/ICU</b> | <b>Infant<br/>LOS SE</b> | <b>Infant<br/>ICU/HDU<br/>cost</b> | <b>Infant<br/>los SCBU</b> | <b>Infant<br/>LOS SE</b> | <b>Infant<br/>SCBU<br/>cost</b> |
|-------------|-------------------|----------------------------------------|----------------------------|-----------------------------------|--------------------------|------------------------------------|----------------------------|--------------------------|---------------------------------|
| PIGF>100    | Normal            | 0.042349                               | 0.024211                   | 13                                | 10.70074                 | 187.1817                           | 0.168241                   | 0.075318                 | 57.20197                        |
|             | GH/CHT/SGA        | 0.073257                               | 0.024801                   | 8.666667                          | 1.92713                  | 215.8625                           | 0.805477                   | 0.237718                 | 273.8621                        |
|             | Pre-<br>eclampsia | 0.151931                               | 0.063425                   | 5.2                               | 1.567997                 | 268.6135                           | 2.176834                   | 1.07045                  | 740.1236                        |
| Plgf<100>12 | Normal            | 0                                      | 0                          | 0                                 | 0                        | 0                                  | 0.442301                   | 0.291395                 | 150.3825                        |
|             | GH/CHT/SGA        | 0.116305                               | 0.037999                   | 7                                 | 1.744341                 | 276.8054                           | 2.375839                   | 0.811442                 | 807.7853                        |
|             | Pre-<br>eclampsia | 0.292303                               | 0.048112                   | 14.39394                          | 3.327992                 | 1430.512                           | 5.90239                    | 1.638849                 | 2006.813                        |
| PIGF<12     | Normal            |                                        |                            |                                   |                          |                                    |                            |                          |                                 |
|             | GH/CHT/SGA        | 0.408132                               | 0.120391                   | 19.57143                          | 8.580245                 | 2715.826                           | 10.5525                    | 6.652056                 | 3587.85                         |
|             | Pre-<br>eclampsia | 0.487437                               | 0.053973                   | 18.55556                          | 3.177951                 | 3075.189                           | 13.17782                   | 3.665785                 | 4480.459                        |

**Table S5.** Model inputs in concealed PIGF testing for antenatal costs

|             | Diagnosis     | Outpatient visits, n mean | Outpatient visits, n SE | Cost     | Antenatal Ward | Antenatal ward se | Cost     | Labour ward | Labour ward SE | Cost     |
|-------------|---------------|---------------------------|-------------------------|----------|----------------|-------------------|----------|-------------|----------------|----------|
| PIGF>100    | Normal        | 11.06014                  | 1.629282                | 1424.767 | 0.948858       | 0.215468          | 767.6262 | 0.392139    | 0.105223       | 283.9087 |
|             | GH/CHT/SGA    | 11.70156                  | 1.521237                | 1507.395 | 2.736931       | 0.474298          | 2214.177 | 0.545693    | 0.114187       | 395.0815 |
|             | Pre-eclampsia | 10.97693                  | 2.015226                | 1414.048 | 3.395794       | 0.84151           | 2747.197 | 0.629727    | 0.170935       | 455.9221 |
| Plgf<100>12 | Normal        | 10.08389                  | 2.167276                | 1299.007 | 1.03271        | 0.354972          | 835.4624 | 0.324179    | 0.133194       | 234.7055 |
|             | GH/CHT/SGA    | 8.561043                  | 1.143293                | 1102.834 | 2.356203       | 0.423323          | 1906.168 | 0.609826    | 0.127806       | 441.514  |
|             | Pre-eclampsia | 9.763741                  | 1.214002                | 1257.765 | 4.748596       | 0.742103          | 3841.614 | 0.764099    | 0.144472       | 553.2074 |
| PIGF<12     | Normal        | 4.952535                  | 2.149283                | 637.9856 | 0.952351       | 0.690364          | 770.4521 | 0.229167    | 0.235714       | 165.9172 |
|             | GH/CHT/SGA    | 7.88944                   | 1.813436                | 1016.318 | 1.791595       | 0.607602          | 1449.4   | 0.496536    | 0.186018       | 359.492  |
|             | Pre-eclampsia | 7.104001                  | 0.909941                | 915.1374 | 5.602629       | 0.890069          | 4532.527 | 0.657822    | 0.128406       | 476.2629 |

**Table S6.** Model inputs in concealed PIGF testing for postnatal costs

|             | <b>Diagnosis</b> | <b>Postnatal<br/>ward<br/>Mean</b> | <b>Postnatal<br/>ward SE</b> | <b>Cost</b> | <b>High<br/>need</b> | <b>High<br/>need SE</b> | <b>Cost</b> |
|-------------|------------------|------------------------------------|------------------------------|-------------|----------------------|-------------------------|-------------|
| PIGF>100    | Normal           | 1.689389                           | 0.219839                     | 1223.118    | 0.054563             | 0.035162                | 55.21776    |
|             | GH/CHT/SGA       | 2.481695                           | 0.252854                     | 1796.747    | 0.259343             | 0.089599                | 262.4553    |
|             | Pre-eclampsia    | 2.40467                            | 0.370908                     | 1740.981    | 0.60471              | 0.254159                | 611.9664    |
| Plgf<100>12 | Normal           | 2.279245                           | 0.425869                     | 1650.173    | 0.533331             | 0.28021                 | 539.7306    |
|             | GH/CHT/SGA       | 2.823447                           | 0.283944                     | 2044.176    | 0.082609             | 0.04041                 | 83.6        |
|             | Pre-eclampsia    | 2.889429                           | 0.267679                     | 2091.947    | 0.853006             | 0.237684                | 863.2418    |
| PIGF<12     | Normal           | 1.762265                           | 0.708562                     | 1275.88     | 3.44E-10             | 9.82E-06                | 3.48E-07    |
|             | GH/CHT/SGA       | 4.015174                           | 0.682349                     | 2906.986    | 3.29E-10             | 4.77E-06                | 3.33E-07    |
|             | Pre-eclampsia    | 3.624549                           | 0.321932                     | 2624.173    | 1.234034             | 0.329472                | 1248.842    |

**Table S7.** Model inputs in concealed PIGF testing for infant costs

|             | <b>Diagnosis</b> | <b>Infant<br/>admitted<br/>HDU/ICU</b> | <b>Infant<br/>admit SE</b> | <b>Infant<br/>los<br/>HDU/ICU</b> | <b>Infant<br/>LOS SE</b> | <b>Infant<br/>ICU/HDU<br/>cost</b> | <b>Infant<br/>los SCBU</b> | <b>Infant<br/>LOS SE</b> | <b>Infant<br/>SCBU<br/>cost</b> |
|-------------|------------------|----------------------------------------|----------------------------|-----------------------------------|--------------------------|------------------------------------|----------------------------|--------------------------|---------------------------------|
| PIGF>100    | Normal           | 0                                      | 0                          | 0                                 | 0                        | 0                                  | 0.707839                   | 0.314946                 | 240.6653                        |
|             | GH/CHT/SGA       | 0.097723                               | 0.036142                   | 35.85714                          | 18.21511                 | 1191.385                           | 1.113436                   | 0.391043                 | 378.5682                        |
|             | Pre-eclampsia    | 0.101768                               | 0.055922                   | 5.333333                          | 5.876411                 | 184.54                             | 1.019797                   | 0.561244                 | 346.731                         |
| Plgf<100>12 | Normal           | 0.101595                               | 0.068008                   | 2.5                               | 1.535764                 | 86.35592                           | 1.555728                   | 1.020697                 | 528.9475                        |
|             | GH/CHT/SGA       | 0.08774                                | 0.035103                   | 40.83333                          | 15.7764                  | 1218.125                           | 3.481389                   | 1.20688                  | 1183.672                        |
|             | Pre-eclampsia    | 0.16184                                | 0.041748                   | 6.714286                          | 3.349861                 | 369.4576                           | 4.259938                   | 1.329539                 | 1448.379                        |
| PIGF<12     | Normal           | 0                                      | 0                          | 0                                 | 0                        | 0                                  | 5.66E-09                   | 3.43E-05                 | 1.92E-06                        |
|             | GH/CHT/SGA       | 0.398552                               | 0.117149                   | 72.28571                          | 26.29157                 | 9795.257                           | 11.41148                   | 7.374402                 | 3879.903                        |
|             | Pre-eclampsia    | 0.379988                               | 0.058471                   | 17.46875                          | 3.781358                 | 2256.889                           | 11.38512                   | 3.55963                  | 3870.941                        |

**Table S8.** Results of model: actual total cost per patient for PIGF and usual care

|             | Diagnosis     | Revealed PIGF |          |           |          | Usual Care |          |           |          |
|-------------|---------------|---------------|----------|-----------|----------|------------|----------|-----------|----------|
|             |               | Total Mat     | Weighted | Total inf | Weighted | Total Mat  | Weighted | Total inf | Weighted |
| PIGF>100    | Normal        | 3252.544      | 413.4316 | 244.3837  | 31.06366 | 3754.638   | 477.2528 | 240.6653  | 30.59102 |
|             | GH/CHT/SGA    | 4288.966      | 830.5346 | 489.7246  | 94.83247 | 6175.856   | 1195.921 | 1569.954  | 304.0129 |
|             | Pre-eclampsia | 8649.493      | 532.5408 | 1008.737  | 62.10695 | 6970.115   | 429.1431 | 531.271   | 32.70983 |
| Plgf<100>12 | Normal        | 3416.586      | 156.0704 | 150.3825  | 6.869507 | 4559.078   | 208.2598 | 615.3034  | 28.10721 |
|             | GH/CHT/SGA    | 5552.207      | 816.0145 | 1084.591  | 159.4036 | 5578.291   | 819.8482 | 2401.797  | 352.995  |
|             | Pre-eclampsia | 8833.204      | 1684.186 | 3437.324  | 655.3786 | 8607.775   | 1641.204 | 1817.837  | 346.5984 |
| PIGF<12     | Normal        | 0             | 0        | 0         | 0        | 2850.235   | 14.15211 | 1.92E-06  | 9.56E-09 |
|             | GH/CHT/SGA    | 8373.424      | 299.3478 | 6303.676  | 225.3549 | 5732.196   | 204.9246 | 13675.16  | 488.8836 |
|             | Pre-eclampsia | 10374.27      | 2008.921 | 7555.648  | 1463.11  | 9796.943   | 1897.124 | 6127.83   | 1186.621 |
